# Supplementary material
Source: PubMed Central journal article supplement (PMC3785892)
Supplement: mmc2.pdf [file mmc2.pdf]

# Short-Term Desensitization of Muscarinic K<sup>+</sup> Current in the Heart

Shingo Murakami,<sup>†\*</sup> Atsushi Inanobe,<sup>††</sup> and Yoshihisa Kurachi<sup>††\*</sup>

<sup>†</sup>Division of Molecular and Cellular Pharmacology, Department of Pharmacology, Graduate School of Medicine and <sup>††</sup>The Center for Advanced Medical Engineering and Informatics, Osaka University, Osaka, Japan

**ABSTRACT** Acetylcholine (ACh) rapidly increases cardiac K<sup>+</sup> currents ( $I_{K_{ACh}}$ ) by activating muscarinic K<sup>+</sup> ( $K_{ACh}$ ) channels followed by a gradual amplitude decrease within seconds. This phenomenon is called short-term desensitization and its precise mechanism and physiological role are still unclear. We constructed a mathematical model for  $I_{K_{ACh}}$  to examine the conditions required to reconstitute short-term desensitization. Two conditions were crucial: two distinct muscarinic receptors ( $m_2Rs$ ) with different affinities for ACh, which conferred an  $I_{K_{ACh}}$  response over a wide range of ACh concentrations, and two distinct  $K_{ACh}$  channels with different affinities for the G-protein  $\beta\gamma$  subunits, which contributed to reconstitution of the temporal behavior of  $I_{K_{ACh}}$ . Under these conditions, the model quantitatively reproduced several unique properties of short-term desensitization observed in myocytes: 1), the peak and quasi-steady states with 0.01–100  $\mu M$  [ACh]; 2), effects of ACh preperfusion; and 3), recovery from short-term desensitization. In the presence of 10  $\mu M$  ACh, the  $I_{K_{ACh}}$  model conferred recurring spontaneous firing after asystole of 8.9 s and 10.7 s for the Demir and Kurata sinoatrial node models, respectively. Therefore, two different populations of  $K_{ACh}$  channels and  $m_2Rs$  may participate in short-term desensitization of  $I_{K_{ACh}}$  in native myocytes, and may be responsible for vagal escape at nodal cells.

## INTRODUCTION

Vagal nerve stimulation causes the release of acetylcholine (ACh) from axonal termini and then decelerates the heartbeat by increasing the amplitude of muscarinic K<sup>+</sup> current ( $I_{K_{ACh}}$ ) in pace-making cells (1–4).  $I_{K_{ACh}}$  activation is gradually decreased to a quasi-steady-state level despite the continuous presence of ACh (2). This phenomenon is classified into two distinct categories by timescale: short-term desensitization, which occurs within seconds immediately after exposure to ACh, and long-term desensitization, which is observed on a scale of minutes to hours. Although the latter appears to be attributable to sequestration of available receptors by modulations such as phosphorylation and internalization (5–9), the precise mechanism and physiological role of the former are still a matter of debate (2,10–16).

ACh binding to  $M_2$  muscarinic receptor ( $m_2R$ ) liberates the  $\beta\gamma$  subunits ( $G_{\beta\gamma}$ ) from pertussis-toxin-sensitive G proteins ( $G_{i/o}$ ) that activate  $I_{K_{ACh}}$ . Interestingly, prestimulation of the  $A_1$ -adenosine receptor, another  $G_{i/o}$ -coupled receptor, prevents ACh-induced short-term desensitization (2). This cross talk between receptors suggests that  $m_2R$  is not involved in short-term desensitization. Constituents downstream of receptor activation, such as G protein and the muscarinic K<sup>+</sup> ( $K_{ACh}$ ) channel, have been proposed to cause this phenomenon (2,10–16). However, how these constituents could quantitatively account for the physiological  $I_{K_{ACh}}$  response has not been fully examined.

Short-term desensitization of  $I_{K_{ACh}}$  is a cellular response against overstimulation by ACh. At the organ level, excess

vagal nerve stimulation eventually causes cardiac asystole, followed by resumption of the heartbeat. This desensitization is called vagal escape and has been explained by compensation from the sympathetic system (17–20). Although ACh causes short-term desensitization of  $I_{K_{ACh}}$  and vagal escape, the functional relevance of these two different phenomena has not been previously examined.

A previously proposed mathematical model for  $I_{K_{ACh}}$  activation consisted of only a single population of  $m_2R$ ,  $K_{ACh}$  channel, and G protein with the chemical cycle reactions (21). However, this linear system was insufficient to reproduce the temporal behavior of  $I_{K_{ACh}}$ , suggesting the need for another hypothesis for the simulation of  $I_{K_{ACh}}$  activation. At the macroscopic level, short-term desensitization is observed at higher ACh concentrations ([ACh]s) (2). The open probability of the  $K_{ACh}$  channel declines until a steady state is reached (22), and is modulated by the concentration of phosphatidylinositol 4,5-bisphosphate (PIP<sub>2</sub>) and the phosphorylation state (23,24). These observations allowed us to hypothesize an additional fraction of  $K_{ACh}$  channels that decrease their activity in a time-dependent manner. Because this fraction was expected to develop at higher [ACh]s, we designated them as  $K_{ACh}$  channels with low affinity for  $G_{\beta\gamma}$  ( $K_{ACh/low}$  channel). To differentiate between two populations of  $K_{ACh}$  channels, another fraction was presumed to have high affinity to  $G_{\beta\gamma}$  ( $K_{ACh/high}$  channel). This assumption contributed to reproduction of the apparent response of the peak and quasi-steady-state components in short-term desensitization, the effects of ACh preperfusion, and the recovery from short-term desensitization experimentally observed in atrial myocytes. We also implemented two populations of  $m_2Rs$  with high and low affinities for ACh (25–29) to confer the  $I_{K_{ACh}}$  response over a wide range

Submitted February 25, 2013, and accepted for publication August 9, 2013.

\*Correspondence: murakami@pharma2.med.osaka-u.ac.jp or ykurachi@pharma2.med.osaka-u.ac.jp

Editor: Andrew McCulloch.

© 2013 by the Biophysical Society  
0006-3495/13/09/1515/11 \$2.00

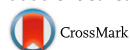

of [ACh]s. Furthermore, integration of these hypotheses reconstituted vagal escape when incorporated into mathematical models of action potential in the sinoatrial node (30–32). These results suggest that short-term desensitization may contribute to vagal escape originating in the sinus node.

## MATERIALS AND METHODS

### $K_{ACh}$ channel model

In this study, we used Monod's allosteric model (33,34) to simulate the interaction between  $G_{\beta\gamma}$  and the  $K_{ACh}$  channels. Previously, we showed that  $G_{\beta\gamma}$  does not affect channel gating at steady state, but does increase the number of functionally active channels to enhance total channel activity (34). The allosteric model with four subunits could describe this regulation of functionally available channels; therefore, we used the allosteric model of a previous  $I_{K_{ACh}}$  model study to reproduce the major features of steady-state  $I_{K_{ACh}}$  and relaxation (21). To study the temporal behavior of  $I_{K_{ACh}}$ , we adopted the experimental observation that high [ACh] modulates the gating kinetics of the  $K_{ACh}$  channel during short-term desensitization (22). To present the kinetically different populations in this phenomenon (22,35), we used two allosteric models with different affinities. Although the allosteric models of the  $K_{ACh/low}$  and  $K_{ACh/high}$  channels are structurally identical, they have different dissociation constants (Fig. 1, top). Similarly to the previous allosteric model (21,34), the  $K_{ACh}$  channel consists of four subunits. The  $K_{ACh}$  channel is a heterotetramer of Kir3.1 and Kir3.4. Because Kir3.1 homotetramers are not functional and the electrophysiological properties of functional Kir3.4 homotetramers are quite different from those of the  $K_{ACh}$  channel (36), we used four subunits with equal affinity and aimed at the reproduction of the experimental activation curve (Fig. S1 A in the Supporting Material). All of the subunits in a given channel are defined as being in the same state, either tense (T) or relaxed (R), and the subunits change state together (concerted transition). One  $G_{\beta\gamma}$  protein equilibrates with one subunit in either the tense or relaxed state with distinct dissociation constants defined as  $K_T$  for tense and  $K_R$  for relaxed. A tetramer without any  $G_{\beta\gamma}$  transitions between the tense and relaxed states according to the equilibrium constant  $L$ . The channels in the relaxed state are considered available to open with fast gating kinetics, and the channels in the tense state are considered unavailable.  $G_{\beta\gamma}$  generated by the G-protein cycle model was used in the allosteric model. By solving a system of

equations (21,34), the channel availabilities for populations with high and low affinities ( $NP_{o,high}$  and  $NP_{o,low}$ , respectively) can be expressed by Eqs. 1 and 2:

$$NP_{o,high} = \frac{\left(1 + L \left(\frac{K_{R,high}}{K_{T,high}}\right)^4\right) \left(1 + \frac{[G_{\beta\gamma}]}{K_{R,high}}\right)^4}{L \left(1 + \left(\frac{K_{R,high}}{K_{T,high}}\right) \frac{[G_{\beta\gamma}]}{K_{R,high}}\right)^4 + \left(1 + \frac{[G_{\beta\gamma}]}{K_{R,high}}\right)^4} \quad (1)$$

$$NP_{o,low} = \frac{\left(1 + L \left(\frac{K_{R,low}}{K_{T,low}}\right)^4\right) \left(1 + \frac{[G_{\beta\gamma}]}{K_{R,low}}\right)^4}{L \left(1 + \left(\frac{K_{R,low}}{K_{T,low}}\right) \frac{[G_{\beta\gamma}]}{K_{R,low}}\right)^4 + \left(1 + \frac{[G_{\beta\gamma}]}{K_{R,low}}\right)^4} \quad (2)$$

The same parameters ( $L$ , the ratio between  $K_{T,i}$  and  $K_{R,i}$ ) validated in the previous study were used so that the experimental densitometry profiles of membranes containing Kir3.4 preincubated with  $G_{\beta\gamma}$  (i.e., the binding relationship between  $K_{ACh}$  channel and  $G_{\beta\gamma}$ ) could still be reproduced (21,37) (Table 1). The values of  $K_{T,high}$  and  $K_{R,high}$  successfully reproduced the experimental activation curve of the  $K_{ACh}$  channel by  $G_{\beta\gamma}$  (38) (Fig. S1 A). A simple sensitive analysis was conducted to see the effects of the  $K_D$  of the  $K_{ACh/low}$  channel on the quantitative reproduction of the peak current ( $I_p$ ) and quasi-steady-state current ( $I_s$ ) (Fig. S2 A). Based on the analysis results the values of  $K_{T,low}$  and  $K_{R,low}$  were set to be increased threefold compared with those of  $K_{T,high}$  and  $K_{R,high}$  to represent low affinity of the  $K_{ACh/low}$  channel.

The current-voltage relationship of  $I_{K_{ACh}}$  with 5.4 mM  $[K^+]_o$  was obtained from a previous study (1) and fitted to the Boltzmann function:  $(v - E_K) / (1 + \exp\{(v - E_K - v_{1/2}) / k\})$ . The fitted equation reproduces the current-voltage relationship of  $I_{K_{ACh}}$  (Fig. S1 B), which is used to calculate  $I_{K_{ACh}}$  in Eq. 3. To present the kinetically different gating kinetics of the two populations (22,35), we calculated  $I_{K_{ACh}}$  using Eq. 3:

$$I_{K_{ACh}} = g_{K_{ACh}} (NP_{o,high} + f \cdot NP_{o,low}) \frac{v - E_K}{1 + e^{\frac{v - E_K + 265.7}{53.6}}} \quad (3)$$

where  $v$  is the membrane potential,  $g_{K_{ACh}}$  is the maximum conductance for  $I_{K_{ACh}}$ ,  $f$  is the desensitization gate variable for the  $K_{ACh/low}$  channel, and  $E_K$  is the equivalent potential for  $K^+$ . The fast decrease in channel activity in

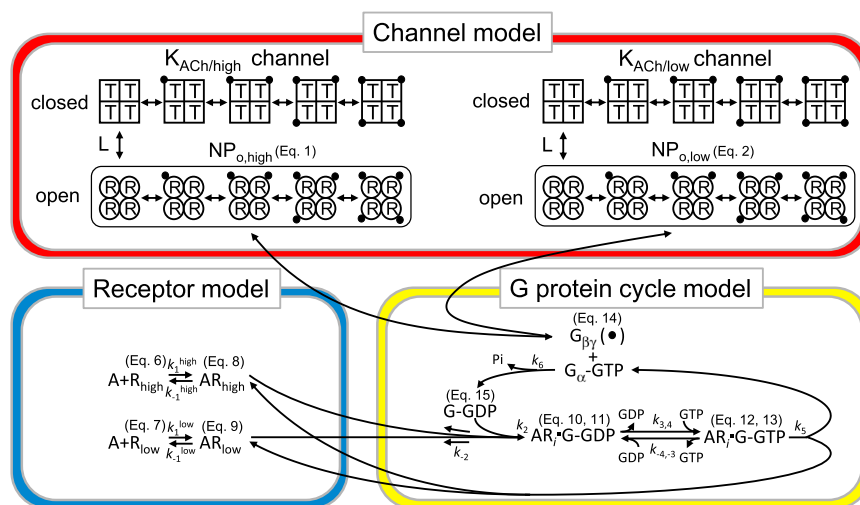

FIGURE 1 Schematic diagrams of the allosteric model for the  $K_{ACh}$  channel and the model for receptor-G-protein interaction. Top: Schematic representation of the allosteric model. In this scheme, each  $K_{ACh}$  channel with either high or low affinities to  $G_{\beta\gamma}$  ( $K_{ACh/high}$  or  $K_{ACh/low}$ , respectively) is assumed to be an oligomer composed of four identical subunits. Each subunit is in either the available (R, relaxed) or unavailable (T, tense) state, which is represented by a circle or a square, respectively. Each subunit in the R or T state binds to one dissociated G-protein  $\beta\gamma$  subunit (solid circles) independently of the other subunits, with the microscopic dissociation constants  $K_R$  or  $K_T$ , respectively. In this model, all subunits in the same oligomer must change their conformations simultaneously.  $R_4$  and  $T_4$  are in equilibrium with the allosteric constant  $L$ . Bottom: Models of receptor-G-protein interaction. The low-affinity state of  $m_2$ R<sub>s</sub> was incorporated into our previous model (21). A, ACh;  $R_{high}$  and  $R_{low}$ , high-affinity and low-affinity  $m_2$ R<sub>s</sub>, respectively; G, G protein.

**TABLE 1** Parameters of the allosteric and G-protein cycle models

| Parameter            | Value                              | Units                 |
|----------------------|------------------------------------|-----------------------|
| L                    | $1.41 \times 10^3$                 | –                     |
| $K_{R,high}$         | $7.50 \times 10^{-10}$             | M                     |
| $K_{T,high}$         | $1.36 \times 10^{-8}$              | M                     |
| $K_{R,low}$          | $2.25 \times 10^{-9}$              | M                     |
| $K_{T,low}$          | $4.09 \times 10^{-8}$              | M                     |
| $k_1^H$              | $2.50 \times 10^6$                 | $s^{-1} \cdot M^{-1}$ |
| $k_1^L$              | $2.50 \times 10^4$                 | $s^{-1} \cdot M^{-1}$ |
| $k_{-1}^H$           | 0.25                               | $s^{-1}$              |
| $k_{-1}^L$           | 0.25                               | $s^{-1}$              |
| $k_2$                | $5.40 \times 10^{-1}$              | $s^{-1} \cdot M^{-1}$ |
| $k_{-2}$             | $1.0 \times 10^3$                  | $s^{-1}$              |
| $k_{3,4}$            | $2.86 \times 10^3$                 | $s^{-1} M^{-1}$       |
| $k_{-4,-3}[GDP]$     | 0.68                               | $s^{-1} \cdot M^{-1}$ |
| $k_5$                | 10                                 | $s^{-1}$              |
| $k_6$                | $0.03 + 2.4/(1 + e^{(-v-60)/-17})$ | $s^{-1}$              |
| $[R_{high}]_{total}$ | $1.87 \times 10^{-3}$              | M                     |
| $[R_{low}]_{total}$  | $1.87 \times 10^{-3}$              | M                     |
| $[G]_{total}$        | $5.60 \times 10^{-2}$              | M                     |

short-term desensitization was associated with the gating kinetics of the  $K_{ACh/low}$  channel and characterized by exponential convergence to a steady state (22). Therefore, to represent this decrease, the kinetics of  $f$  were calculated using Hodgkin-Huxley-type equations:

$$f_{ss} = \frac{2.5}{1 + e^{\frac{[G_{\beta\gamma}]^{-7.0 \cdot 10^{-9}}}{1.0 \cdot 10^{-9}}}} \quad (4)$$

$$\tau_f = 10 + \frac{110}{1.0 + e^{\frac{[G_{\beta\gamma}]^{-7.0 \cdot 10^{-9}}}{1.0 \cdot 10^{-9}}}} \quad (5)$$

where  $f_{ss}$  is the steady state of  $f$ ,  $\tau_f$  is the time constant for  $f$ , and  $[G_{\beta\gamma}]$  is the concentration of  $G_{\beta\gamma}$  in M.

## G-protein cycle model

ACh causes a biphasic response in  $m_2R$  over a wide range of  $[ACh]$ s (25–29). Therefore, we simulated  $G_{\beta\gamma}$  generation by the G-protein cycle model (21) using two  $m_2R$ s with either high or low affinity for ACh (Fig. 1, bottom). In the G-protein cycle model presented here, the reaction rates are represented by differential rate equations with rate constants and concentrations, as done in other studies (39–41). We calculated the values of 10 concentrations using the following ordinary differential equations (Eqs. 6–15):

$$\frac{d[R_{high}]}{dt} = -k_1^{high}[A][R_{high}] + k_{-1}^{high}[AR_{high}] \quad (6)$$

$$\frac{d[R_{low}]}{dt} = -k_1^{low}[A][R_{low}] + k_{-1}^{low}[AR_{low}] \quad (7)$$

$$\begin{aligned} \frac{d[AR_{high}]}{dt} = & k_1^{high}[A][R_{high}] - k_{-1}^{high}[AR_{high}] \\ & + k_{-2}[AR_{high}G - GDP] - k_2[AR_{high}] \\ & \times [G - GDP] + k_5[AR_{high}G - GTP] \end{aligned} \quad (8)$$

$$\begin{aligned} \frac{d[AR_{low}]}{dt} = & k_1^{low}[A][R_{low}] - k_{-1}^{low}[AR_{low}] \\ & + k_{-2}[AR_{low}G - GDP] - k_2[AR_{low}] \\ & \times [G - GDP] + k_5[AR_{low}G - GTP] \end{aligned} \quad (9)$$

$$\begin{aligned} \frac{d[AR_{high}G - GDP]}{dt} = & -k_{-2}[AR_{high}G - GDP] \\ & + k_2[AR_{high}][G - GDP] \\ & - k_{3,4}[AR_{high}G - GDP][GTP] \\ & + k_{-4,-3}[AR_{high}G - GTP][GDP] \end{aligned} \quad (10)$$

$$\begin{aligned} \frac{d[AR_{low}G - GDP]}{dt} = & -k_{-2}[AR_{low}G - GDP] \\ & + k_2[AR_{low}][G - GDP] \\ & - k_{3,4}[AR_{low}G - GDP][GTP] \\ & + k_{-4,-3}[AR_{low}G - GTP][GDP] \end{aligned} \quad (11)$$

$$\begin{aligned} \frac{d[AR_{high}G - GTP]}{dt} = & k_{3,4}[AR_{high}G - GDP][GTP] \\ & - k_{-4,-3}[AR_{high}G - GTP][GDP] \\ & - k_5[AR_{high}G - GTP] \end{aligned} \quad (12)$$

$$\begin{aligned} \frac{d[AR_{low}G - GTP]}{dt} = & k_{3,4}[AR_{low}G - GDP][GTP] \\ & - k_{-4,-3}[AR_{low}G - GTP][GDP] \\ & - k_5[AR_{low}G - GTP] \end{aligned} \quad (13)$$

$$\begin{aligned} \frac{d[G_{\alpha} - GTP]}{dt} = & \frac{d[G_{\beta\gamma}]}{dt} \\ = & k_5[AR_{high}G - GTP] \\ & + k_5[AR_{low}G - GTP] - k_6[G - GTP] \end{aligned} \quad (14)$$

$$\begin{aligned} \frac{d[G - GDP]}{dt} = & k_6[G - GTP] + k_{-2}([AR_{high}G - GDP] \\ & + [AR_{low}G - GDP]) - k_2([AR_{high}] \\ & + [AR_{low}])[G - GDP] \end{aligned} \quad (15)$$

where A is ACh;  $R_{high}$  and  $R_{low}$  are  $m_2R$ s with high and low affinities for ACh, respectively; G is the  $G_{i/o}$  protein; and  $k$  is the reaction rate constant. The value of each rate constant was fixed, except for  $k_6$ , which was defined as a function of membrane voltage (Table 1) to incorporate the regulation of G-protein signaling (RGS). RGS proteins regulate G-protein signaling by accelerating GTP hydrolysis in a voltage-dependent manner and are required to reconstitute short-term desensitization (42–44). On the basis of the voltage- and time-dependent characteristics of  $I_{KACH}$  in atrial myocytes known as relaxation (44–46),  $k_6$  is defined as a function of membrane voltage so that depolarization of the membrane potential can accelerate GTPase activity. This relaxation of  $I_{KACH}$  reflects an increasing suppression of channel open probability during depolarization (i.e., strong accelerated GTP hydrolysis at depolarization) and a gradual recovery during hyperpolarization (i.e., less accelerated GTP hydrolysis

at hyperpolarization). The voltage-dependent  $\text{Ca}^{2+}$  influx and  $\text{Ca}^{2+}/\text{CaM}$  modulation of RGS protein activity have been suggested as one of the underlying mechanisms (44). We did not incorporate the possible voltage dependence of  $m_2\text{R}$  into our model because its electrophysiological function and properties have not yet been fully elucidated. The parameters in the G-protein cycle were mainly taken from the previous model (21) with minor modifications to incorporate the low-affinity interaction of  $m_2\text{R}$  with ACh. On the basis of experimental results (25–29), we introduced  $m_2\text{R}$  with low affinity to ACh into our model. The values of  $k_1^{\text{low}}$  and  $k_{-1}^{\text{low}}$  were selected so that low affinity and high affinity differed by a factor of 100 (47). By a simple, sensitive analysis, we verified that this value could reproduce the unique characteristics of short-term desensitization in a wide range of [ACh]s, whereas factors of 10 and 1000 could not reproduce the constant increase in  $I_P$  in the wide range of [ACh]s (Fig. S2 B). The values of  $k_2$  and  $k_{-2}$  were increased from those in the previous model so that the calculated  $G_{\beta\gamma}$  concentration would be sufficient to activate the allosteric model with a realistic activation curve. The  $G_{\beta\gamma}$  concentration generated by the G-protein cycle model was added to the allosteric model, and then channel availability and  $I_{\text{KACH}}$  were calculated.

### Incorporation of the $I_{\text{KACH}}$ model into the sinoatrial node models

We examined the effect of short-term desensitization on the action potential by incorporating the  $I_{\text{KACH}}$  model into two mathematical models of action potential in the rabbit sinoatrial node (30–32). The original  $I_{\text{KACH}}$  model in the sinoatrial node model was replaced with the  $I_{\text{KACH}}$  model constructed in this study. The membrane potentials were calculated at 0.1  $\mu\text{M}$  and 10  $\mu\text{M}$  ACh. ACh activates  $G_i$  proteins that reduce adenylyl cyclase activity and therefore inhibits the hyperpolarization-activated current ( $I_f$ ) and the L-type  $\text{Ca}^{2+}$  current ( $I_{\text{Ca,L}}$ ) in sinoatrial nodes. On the basis of the experimental dose-dependent effects of ACh for  $I_f$  and  $I_{\text{Ca,L}}$  in single cells isolated from rabbit sinoatrial nodes (48), the effects of ACh on  $I_f$  and  $I_{\text{Ca,L}}$  were modeled and incorporated into the sinoatrial models. In the simulation, 0.1  $\mu\text{M}$  ACh inhibits only  $I_f$  by a negative shift of its activation curve by 7.0 mV, whereas 10  $\mu\text{M}$  ACh inhibits  $I_f$  by a 9.9 mV shift, and inhibits  $I_{\text{Ca,L}}$  by reducing its maximum conductance by 12.5%.

## RESULTS

### Simulation of $I_{\text{KACH}}$ in response to ACh

First, induction of  $I_{\text{KACH}}$  by various [ACh]s was simulated using the constructed model (Fig. 2) and quantitatively compared with experimental results (Fig. 3). The simulation conditions were the same as in the previous study (2), i.e., the membrane potential was held at  $-53$  mV and  $E_K$  was  $-87$  mV. When various [ACh]s were applied, the outward  $I_{\text{KACH}}$  responses exhibited the typical characteristics of short-term desensitization (Fig. 2 A, solid lines). As [ACh] increased, the maximum  $I_{\text{KACH}}$  amplitude increased and the response was faster. At [ACh]  $> 0.1$   $\mu\text{M}$ , the  $I_{\text{KACH}}$  gradually decreased after reaching a peak. The time constants for the simulated decreases were 12.9 s, 10.5 s, and 10.3 s for [ACh] = 1  $\mu\text{M}$ , 10  $\mu\text{M}$ , and 100  $\mu\text{M}$ , which are comparable to values observed in previous experiments (11.8 s (2) and 7.3–12.7 s (16)). The  $I_P$  during application of ACh was used to quantify the dependence of short-term desensitization on [ACh] (Fig. 3, row 1, upper solid line). The  $I_P$  increased constantly over a wide range of [ACh]s, in accord with the values recorded experimentally (Fig. 3, row 1, upper circles) (2). In contrast to the  $I_P$ , the  $I_S$  that is measured at the end of ACh application exhibited saturation of current increase at [ACh]s  $> 1$   $\mu\text{M}$  (Fig. 3, row 1, lower solid line). This response of  $I_S$  is consistent with that observed in isolated myocytes (Fig. 3, row 1, lower circles). The two  $\text{K}_{\text{ACH}}$  channel populations contributed to the responses of  $I_P$  and  $I_S$ : the  $I_P$  is composed of the current response of the  $\text{K}_{\text{ACH/low}}$  and  $\text{K}_{\text{ACH/high}}$  channels (Fig. 3, rows 2 and 3), whereas the  $I_S$  mainly consists of only the  $\text{K}_{\text{ACH/high}}$  channel (Fig. 2 A, dotted lines). When  $m_2\text{R}$  with low affinity for ACh was removed from the model, the increase in the amplitude of  $I_P$  was not observed at

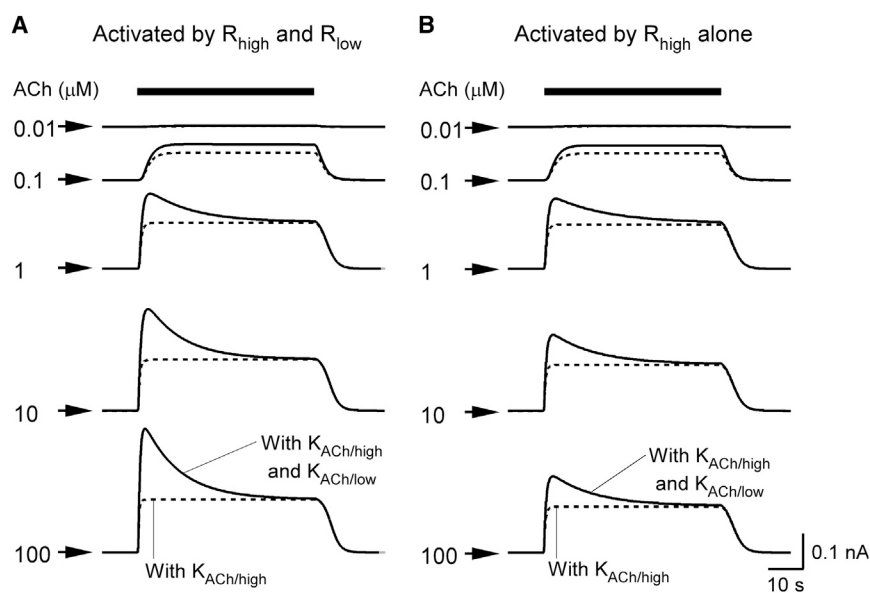

FIGURE 2 Simulated short-term desensitization. (A) Time course of  $I_{\text{KACH}}$  activation by various [ACh]s. The simulated responses of  $I_{\text{KACH}}$  at various [ACh]s (0.01–100  $\mu\text{M}$ ) are shown as solid lines. The value of  $g_{\text{KACH}}$  was set to 0.16 to reproduce the  $I_{\text{KACH}}$  amplitude in a quasi-steady state at  $-53$  mV and 5.4 mM  $\text{K}_o$  (1).  $I_{\text{KACH}}$  in the absence of the  $\text{K}_{\text{ACH/low}}$  channel is shown as dotted lines. The bar above the current traces represents the period of ACh perfusion. The [ACh]s are indicated in  $\mu\text{M}$  at each current trace. Arrows indicate the zero current. (B)  $I_{\text{KACH}}$  in the absence of  $m_2\text{R}$  with low affinity for ACh. Simulated  $I_{\text{KACH}}$  without low-affinity  $m_2\text{R}$  to ACh is shown in the same manner as in (A).  $I_{\text{KACH}}$  in the absence of the  $\text{K}_{\text{ACH/low}}$  channel is shown as dotted lines.

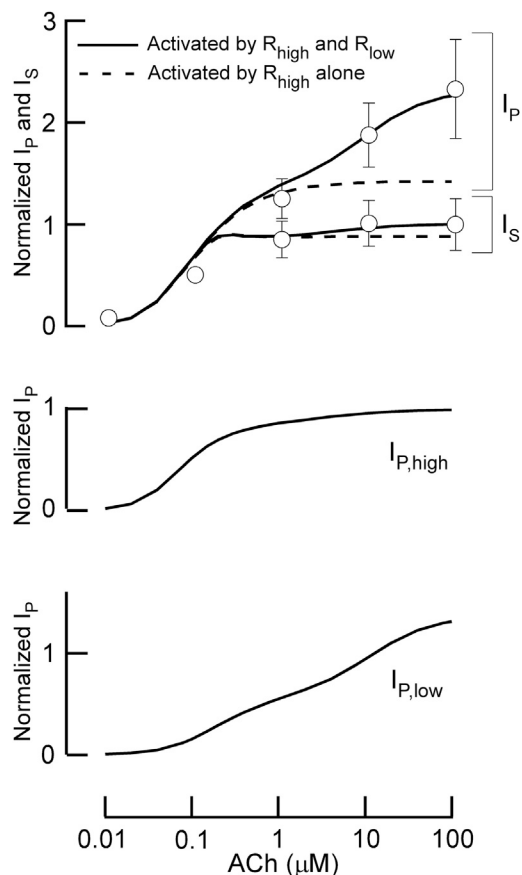

FIGURE 3 Quantitative analysis of simulated short-term desensitization. Dose-response curves for ACh-induced peak and quasi-steady  $I_{K_{ACh}}$ . Top panel: The simulated peak current ( $I_P$ ) and quasi-steady-state current ( $I_S$ ) are shown as solid lines. Experimental data (2) for peak and quasi-steady  $I_{K_{ACh}}$  are shown as circles with the standard deviation (SD). In the graph, the quasi-steady  $I_{K_{ACh}}$  induced by 100  $\mu\text{M}$  ACh is expressed as one.  $I_{K_{ACh}}$  in the absence of  $m_2R$  with low affinity for ACh is shown as dashed lines. Middle panel: Dose-response curve for  $I_P$  through the  $K_{ACh/high}$  channel. The  $I_P$  through  $K_{ACh/high}$  channel is shown as a solid line. The currents are normalized as in row 1. Bottom panel: Dose-response curve for  $I_P$  through the  $K_{ACh/low}$  channel. The  $I_P$  through the  $K_{ACh/low}$  channel is shown in the same manner as in the middle panel.

high [ACh]s (Fig. 2 B, solid line; Fig. 3, row 1, dashed lines). Further, removal of the  $K_{ACh/low}$  channels resulted in complete loss of short-term desensitization (Fig. 2 B, dotted lines). Previous mathematical models that dealt with the G-protein cycle (11) and were equipped with a single population of  $K_{ACh}$  channels (21) did not reproduce the responses of  $I_P$  and  $I_S$  over a wide range of [ACh]s. Therefore, mechanisms based on two different  $m_2R$ s and  $K_{ACh}$  channels quantitatively account for the short-term desensitization of  $I_{K_{ACh}}$ .

### Characterization of short-term desensitization in the $I_{K_{ACh}}$ model

When atrial myocytes were serially perfused with bath solutions containing different [ACh]s, the amplitude of  $I_P$  in the second ACh application was decreased by the high [ACh] of

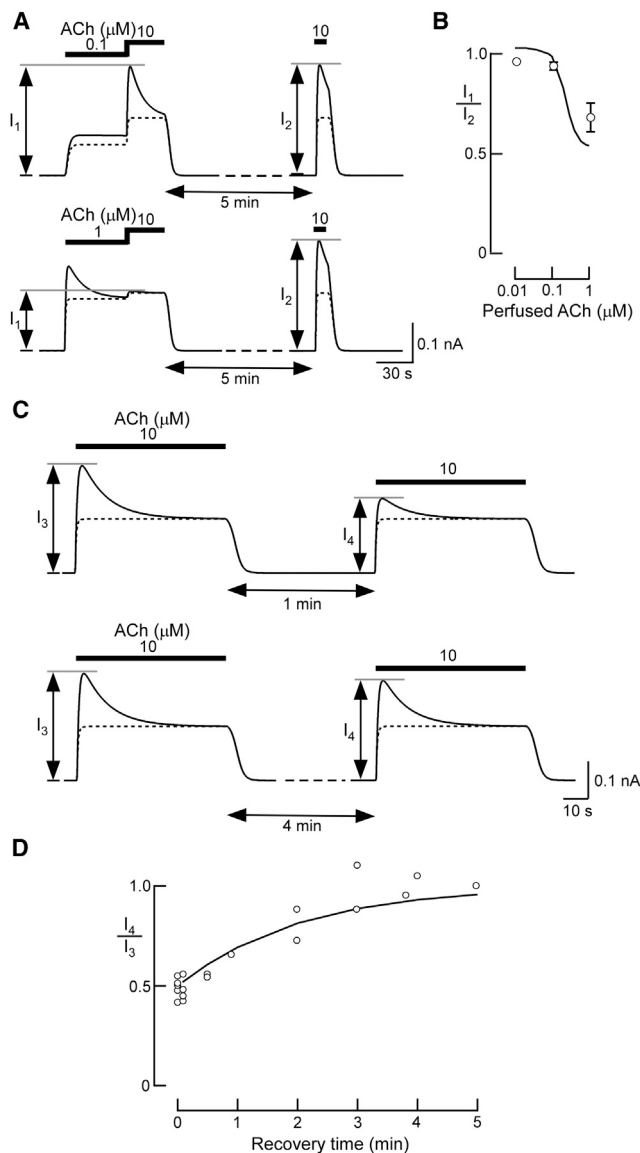

FIGURE 4 Analysis of simulated ACh preperfusion and recovery from short-term desensitization. (A) Traces of simulated  $I_{K_{ACh}}$  with ACh preperfusion. The bars above the current traces represent perfusion with various [ACh]s (indicated in  $\mu\text{M}$ ). (B) Simulated dose response after ACh preperfusion.  $I_P$  induced with 0.01 to 1  $\mu\text{M}$  ACh preperfusion ( $I_1$ ) was plotted with reference to the control  $I_P$  value ( $I_2$ ). The experimental data (2) are shown as circles. (C) Traces of simulated recovery from short-term desensitization by ACh. ACh (10  $\mu\text{M}$ ) was applied during the two periods indicated by the bars below the current traces. (D) Time dependence of simulated recovery from short-term desensitization. The values of the control  $I_P$  at 10  $\mu\text{M}$  ACh before a washout period ( $I_3$ ) were set at one. The ratio of  $I_4/I_3$  in (C) was plotted to determine the time dependence of recovery from short-term desensitization. The experimental data (2) are shown as circles.

the first application (2). Therefore, the degree of experimental short-term desensitization is influenced by preperfusion with ACh. Using our model, we calculated  $I_P$  during the second ACh application ( $I_1$ , 10  $\mu\text{M}$ ) after applying various [ACh]s (0.01–1  $\mu\text{M}$ ) (Fig. 4 A), and then compared the amplitude of the  $I_1$  with that of the  $I_P$  elicited by 10  $\mu\text{M}$

ACh applied after a 5-min interval ( $I_2$ ) (Fig. 4 B). The  $I_1$  amplitude during preapplication of ACh at  $0.1 \mu\text{M}$  did not differ significantly from the  $I_2$  amplitude (Fig. 4 A, top). However, when the [ACh] was increased to  $1 \mu\text{M}$ ,  $I_1$  decreased to approximately one-half of  $I_2$  (Fig. 4 A, bottom). The calculated ratio of  $I_1$  to  $I_2$  (Fig. 4 B, solid line) was comparable to that experimentally observed in atrial myocytes (Fig. 4 B, circles) (2). In contrast to the change in  $I_1$  amplitude, the [ACh] in the first application did not influence the fraction of  $I_{\text{KACH}}$  through the  $K_{\text{ACH/high}}$  channel in  $I_2$  (Fig. 4 A, dotted lines). Therefore, our model reproduces the decreased  $I_{\text{P}}$  amplitude after perfusion of high [ACh], suggesting that the desensitization of  $I_{\text{KACH}}$  during preperfusion of ACh is attributable to desensitization of the  $K_{\text{ACH/low}}$  channel.

As shown in Fig. 4 A, the response of  $I_{\text{KACH}}$  to ACh is recovered from the desensitized state by perfusion with an ACh-free bath solution (2). Therefore, we determined the time course of recovery from desensitization. The  $I_{\text{P}}$  amplitudes elicited by the first and second applications of  $10 \mu\text{M}$  ACh ( $I_3$  and  $I_4$ , respectively) were compared when the administration interval was changed (Fig. 4 C). As the washout time was prolonged, the ratio of  $I_4$  to  $I_3$  gradually increased and returned to one within 5 min (Fig. 4 D, solid line). This temporal response of simulated recovery is nearly identical to that measured experimentally (Fig. 4 D, circles) (2). The recovery rate was dependent on the time constant for  $G_{\beta\gamma}$ -dependent desensitization of the  $K_{\text{ACH/low}}$  channel. Since the current amplitude through the  $K_{\text{ACH/high}}$  channel was nearly constant regardless of the interval duration (Fig. 4 C, dotted lines), this recovery can be attributable to the recovery of the  $K_{\text{ACH/low}}$  channel from the desensitized state. Thus, the  $I_{\text{P}}$  and  $I_{\text{S}}$  in simulated short-term desensitization are comparable to those obtained in experiments. Short-term desensitization in experiments is usually evaluated quantitatively only by using the percentage of desensitization of  $I_{\text{KACH}}$  at a certain, high [ACh] (11,14–16,49,50). We further validated the model by quantitatively comparing the simulated results of ACh preperfusion and recovery with the experimental results. Therefore, the major characteristics of short-term desensitization can be well captured by our  $I_{\text{KACH}}$  model on the basis of the assumption that the current is due to two populations of  $K_{\text{ACH}}$  channels with different affinities for  $G_{\beta\gamma}$ .

### Effects of nucleotide-bound states of G-protein on short-term desensitization

The transient change in the population of nucleotide-bound G proteins has been proposed to be responsible for the short-term desensitization of  $I_{\text{KACH}}$  (11,14). Using our model, we examined the effects of nucleotides on the  $I_{\text{KACH}}$  response (Fig. 5). In the presence of  $0.1 \mu\text{M}$  ACh, application of high GTP ( $200 \mu\text{M}$ ) over a short time period induced short-term desensitization (Fig. 5 A, solid line). The contin-

uous presence of excess GDP ( $1 \text{ mM}$ ) in the bath solution (Fig. 5 B) and reduction of the  $m_2\text{R}$  concentration by 50% (Fig. 5 C) effectively suppressed the GTP-induced short-term desensitization. These results are consistent with previously reported experimental results (11) and can be accounted for by the different degrees of the activation of the G-protein cycle (Fig. S3, B, D, and F). Next, we changed the rate parameters for nucleotide exchange on the G protein to reveal how its nucleotide-bound state affects short-term desensitization. When the rates for GDP/GTP exchange increased fivefold, ACh-induced short-term desensitization was strongly enhanced (Fig. 5 D, solid line). In contrast, when the rates were lowered to one-half, ACh-induced short-term desensitization was suppressed (Fig. 5 E). This is because fast GDP/GTP exchange enhances the formation of GTP-bound G protein (Fig. S3, H and J). Therefore, the nucleotide-bound state of G protein appears to be important in the development of short-term desensitization. However, when the  $K_{\text{ACH/low}}$  channel was omitted from the model, short-term desensitization was not produced under any condition (Fig. 5, dotted lines). Therefore, our theoretical analysis suggests that the  $K_{\text{ACH/low}}$  channel plays an essential role in reconstitution of short-term desensitization, and an additional role in modulating the nucleotide-bound state of G proteins.

### Simulation of the effect of membrane potentials on short-term desensitization

$M_2\text{R}$ -dependent G protein signaling is enhanced at hyperpolarization (44,46). Because our  $I_{\text{KACH}}$  model retains the voltage dependence incorporated into the previous model (21), we tested how membrane potential affects short-term desensitization of  $I_{\text{KACH}}$  (Fig. 6). At  $10 \mu\text{M}$  ACh, short-term desensitization occurred even at depolarized potential ( $0 \text{ mV}$ ), but it became more distinct at hyperpolarized potential (Fig. 6 A). Short-term desensitization was calculated in the presence of various [ACh]s at  $-80 \text{ mV}$ ,  $-50 \text{ mV}$ , and  $0 \text{ mV}$  (Fig. 6 B). At hyperpolarization ( $-80 \text{ mV}$ ),  $I_{\text{KACH}}$  started to exhibit short-term desensitization even at  $0.1 \mu\text{M}$  ACh. In contrast, at depolarization ( $0 \text{ mV}$ ), this transient current response developed at [ACh]  $> 1 \mu\text{M}$ . These simulations demonstrate that hyperpolarization shifts the [ACh] threshold for short-term desensitization to lower concentrations.

### The role of short-term desensitization in action potential generation in the sinoatrial node

The two incorporated mechanisms quantitatively reconstituted short-term desensitization in the  $I_{\text{KACH}}$  model. We next investigated how their characteristics were involved in the regulation of cardiac function. To address this question, we replaced the  $I_{\text{KACH}}$  portion in the action potential models in the rabbit sinoatrial node with our  $I_{\text{KACH}}$  model.

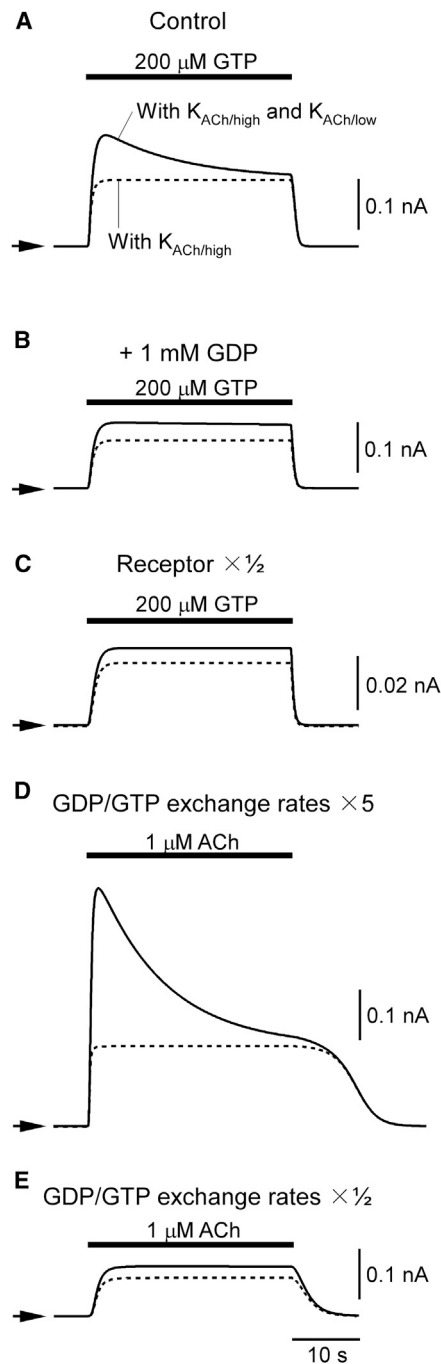

**FIGURE 5** Effect of GDP/GTP exchange on short-term desensitization. (A) Traces of simulated  $I_{K_{ACh}}$  elicited by  $200 \mu\text{M}$  GTP. The bar above the current traces represents the period of GTP perfusion. To represent basal  $I_{K_{ACh}}$  activity in the corresponding experimental condition (11),  $0.1 \mu\text{M}$  ACh was applied during the simulation period.  $I_{K_{ACh}}$  through the  $K_{ACh/low}$  channel only is shown as a dotted line. The arrowheads indicate the zero current level of each trace. The original values of initial  $[R_{high}]$  and  $[R_{low}]$  were used to represent high receptor expression in the experiments (11). (B) Effect of  $1 \text{ mM}$  GDP on  $I_{K_{ACh}}$  induced by  $200 \mu\text{M}$  GTP.  $I_{K_{ACh}}$  was elicited in the same way as in A except that  $1 \text{ mM}$  GDP was applied during the entire simulation period. (C) Traces of simulated  $I_{K_{ACh}}$  elicited by  $200 \mu\text{M}$  GTP with low receptor expression.  $I_{K_{ACh}}$  was elicited in the same way as in A except that  $[R_{high}]$  and  $[R_{low}]$  were lowered to 50% to represent low receptor expression in the experiments (11). (D) Effect of high GDP/GTP exchange activity

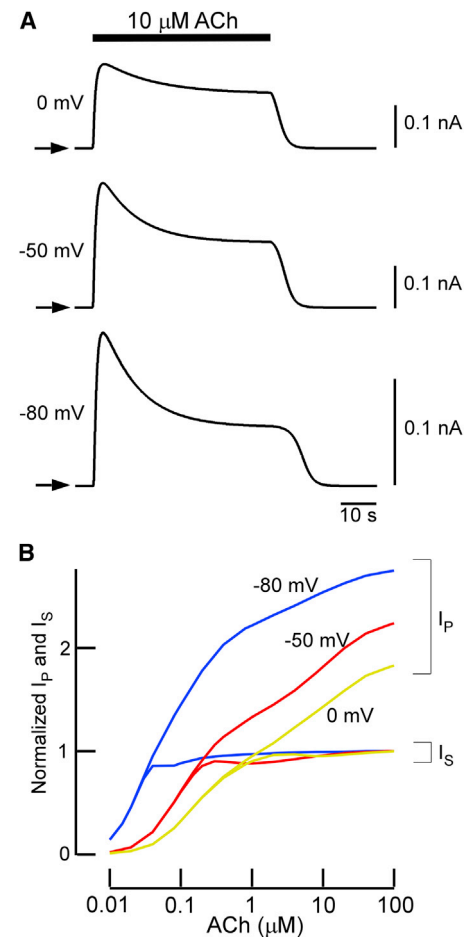

**FIGURE 6** Voltage dependence in short-term desensitization. (A) The effect of  $10 \mu\text{M}$  ACh on short-term desensitization at different membrane voltages.  $I_{K_{ACh}}$  was activated by  $10 \mu\text{M}$  ACh at potentials of  $0 \text{ mV}$ ,  $-50 \text{ mV}$ , and  $-80 \text{ mV}$ . Arrows indicate the zero current levels of each trace. (B) Voltage-dependent dose-response curves for peak and quasi-steady-state  $I_{K_{ACh}}$ . The peak current ( $I_p$ ) and quasi-steady-state current ( $I_s$ ) at clamped membrane potentials of  $-80 \text{ mV}$ ,  $-50 \text{ mV}$ , and  $0 \text{ mV}$  are shown as blue, red, and yellow lines, respectively.  $I_s$  induced by  $100 \mu\text{M}$  ACh was set to one.

Two models of cardiac pacemaker activity, the Demir model (30,31) and the Kurata model (32), were subjected to the simulation. The former is a classical Hodgkin-Huxley-type model, and the latter is a model with updated ion channels and intracellular  $\text{Ca}^{2+}$  models. Application of low  $[\text{ACh}]$  ( $0.1 \mu\text{M}$ ) increased outward  $I_{K_{ACh}}$  (Fig. 7 A, rows 2 and 4) and reduced the action potential frequency by 14.5% in the Demir model (Fig. 7 A, row 1) and by 12.4% in the Kurata model (Fig. 7 E, row 1). These values are in the range of the experimental responses to the applied  $[\text{ACh}]$ :  $0.1 \mu\text{M}$  ACh decreased the action potential

on ACh-induced short-term desensitization. GDP/GTP exchange was enhanced by increasing the rate constants for GDP/GTP exchange ( $k_{3,4}$  and  $k_{4,-3}$ ) by a factor of 5. The period during which ACh was perfused is shown as a bar above the current trace. (E) The effect of low GDP/GTP exchange activity on ACh-induced short-term desensitization. GDP/GTP exchange was lowered by reducing the rate constants to one-half.

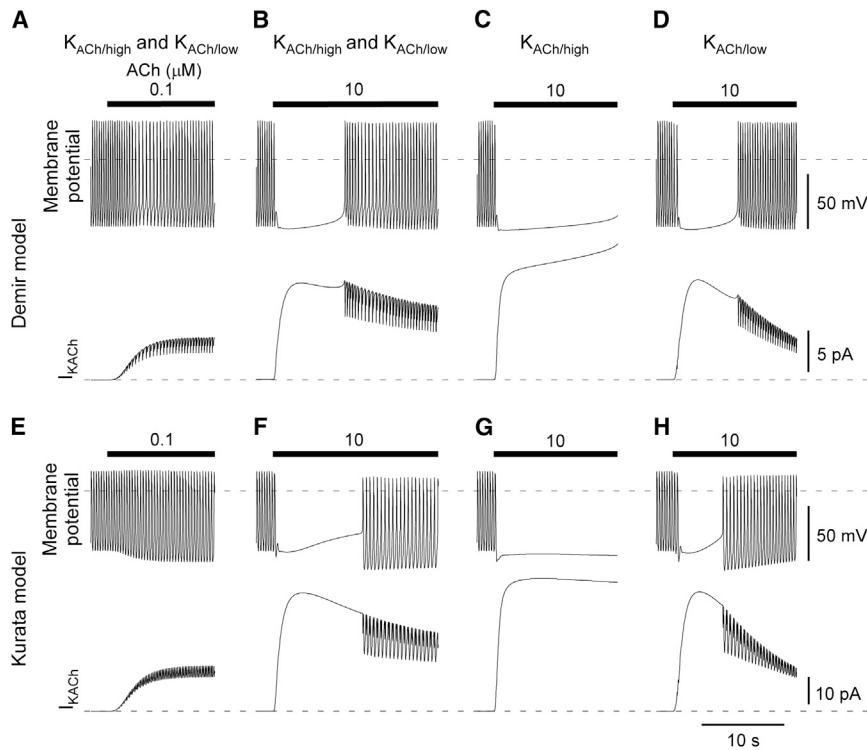

**FIGURE 7** Role of short-term desensitization in spontaneous firing of the sinoatrial node. (*A* and *E*) Effects of 0.1  $\mu\text{M}$  ACh on spontaneous firing in the Demir and Kurata sinoatrial node models. The current  $I_{\text{KACh}}$  model was incorporated into the Demir (*A*) and Kurata (*E*) sinoatrial node models (30–32) and 0.1  $\mu\text{M}$  ACh was applied during the period indicated by the bar. The dashed lines indicate the zero level of each trace. The value of  $g_{\text{KACh}}$  was set at 1.1 (pS/pF) for the Demir model and at 6 (pS/pF) for the Kurata model. (*B* and *F*) Effects of 10  $\mu\text{M}$  [ACh] on spontaneous firing. Parameters are the same as in *A* and *E* except that 10  $\mu\text{M}$  ACh was applied. (*C* and *G*) Effects of 10  $\mu\text{M}$  ACh on the  $K_{\text{ACh/high}}$  channel only. Parameters are the same as in *B* and *F* except that the  $K_{\text{ACh/low}}$  channel was replaced with the  $K_{\text{ACh/high}}$  channel. (*D* and *H*) Effects of 10  $\mu\text{M}$  ACh on the  $K_{\text{ACh/low}}$  channel only. Parameters are the same as in *B* and *F* except that the  $K_{\text{ACh/high}}$  channel was replaced with the  $K_{\text{ACh/low}}$  channel.

frequency by 0% (51) or 30% (30,52). The cycle length was prolonged by 46.0 ms and 43.0 ms, the maximum diastolic potential was reduced by 1.0 mV and 9.7 mV, and action potential amplitude was increased by 1.1 mV and 9.0 mV in the Demir model and Kurata model, respectively. In contrast, application of 10  $\mu\text{M}$  ACh suspended the spontaneous generation of action potential in the two models (Fig. 7, *B* and *F*, row 1). This suspension was caused by the strong activation of  $I_{\text{KACh}}$  (Fig. 7, *B* and *F*, row 2). However, action potential firing resumed in 8.9 s in the Demir model and in 10.7 s in the Kurata model. These time periods are comparable to those reported for the recovery from vagal escape observed in myocytes isolated from rabbit sinoatrial nodes (52). This phenomenon was observed even when a wide range of different values of  $g_{\text{KACh}}$  were used (Fig. S4) or when ACh modulation on  $I_f$  and  $I_{\text{Ca,L}}$  was not incorporated. Resumption was mainly due to the gradual decrease in the outward current. Moreover, the hyperpolarization may facilitate short-term desensitization (see Fig. 6).

To examine the effects of the two populations of  $K_{\text{ACh}}$  channels on the resumption, we replaced our  $I_{\text{KACh}}$  model with an  $I_{\text{KACh}}$  model that contained only  $K_{\text{ACh/high}}$  channels or only  $K_{\text{ACh/low}}$  channels. In both action potential models of the sinoatrial node, incorporation of the  $I_{\text{KACh}}$  model with the  $K_{\text{ACh/high}}$  channel alone resulted in cardiac asystole with 10  $\mu\text{M}$  ACh, and failed to resume during ACh application (Fig. 7, *C* and *G*). In contrast, the  $I_{\text{KACh}}$  model with the  $K_{\text{ACh/low}}$  channel alone resulted in brief suspension of spontaneous firing (Fig. 7, *D* and *H*). These results suggest that

the  $K_{\text{ACh/low}}$  channel is critical for the linkage between short-term desensitization and vagal escape.

## DISCUSSION

Short-term desensitization of  $I_{\text{KACh}}$  is an adaptation mechanism for excessive vagal nerve stimulation in cardiac myocytes. In this study, we addressed the mechanisms underlying short-term desensitization of  $I_{\text{KACh}}$  theoretically. On the basis of experimental evidence, we hypothesized the existence of two populations of  $m_2\text{R}$  and  $K_{\text{ACh}}$  channels with different affinities to ACh and  $G_{\beta\gamma}$ , respectively. The introduction of  $m_2\text{Rs}$  enabled the model to respond to a wide range of [ACh]s. The introduction of  $K_{\text{ACh}}$  channels resulted in quantitative reproduction of the temporal behavior of the  $I_{\text{KACh}}$  current in short-term desensitization. Furthermore, the model conferred vagal escape on the mathematical action potential models of sinus node cells. These results allow us to propose that two functionally distinct populations of  $m_2\text{Rs}$  and  $K_{\text{ACh}}$  channels underlie the physiological  $I_{\text{KACh}}$  response of short-term desensitization.

To date, both G protein and the  $K_{\text{ACh}}$  channel have been proposed to be responsible for short-term desensitization. Experimental manipulations that lead to a rapid increase in free  $G_{\beta\gamma}$  induce short-term desensitization (11,14,16,42,43,53). However, neither previous models (11,21) nor our model without the  $K_{\text{ACh/low}}$  channel quantitatively reconstituted this phenomenon. This is simply because a linear model of the G-protein cycle cannot



represent the transient response of  $I_{K_{ACh}}$ . We hypothesized the  $K_{ACh/low}$  channel as the missing component. This fraction is likely a  $K_{ACh}$  channel with a different gating kinetic (35) or modulatory system, such as  $PIP_2$  (23,54) and phosphorylation (24), as discussed below. The  $K^+$  ion passing through the  $K^+$  channels has been proposed to account for short-term desensitization (15). This theory is based on the shift of  $E_K$  by  $K^+$  flux in the microspace in close proximity to the plasma membrane. This explanation, however, cannot account for the constant  $I_S$  after various amplitudes of  $I_P$  under a wide range of  $[ACh]$ s. Although our mathematical model reproduced the effects of not only  $m_2R$  stimulation (Figs. 2–4) but also G-protein-cycle modification (Fig. 5), there may be some discrepancy between the physiological phenomena and the model design and parameters. However, the theory we propose here is robust to various perturbations (Figs. 2–5; Fig. S4). Therefore, possible deviations in the model structure and parameters would not weaken our conclusion.

Although two different  $m_2R$  populations with high and low affinities for ACh are well known, this has been ignored in previous models (25–29). Experimentally, cardiac  $m_2R$  shows a biphasic response over a wide range of  $[ACh]$ s (to a factor of  $10^4$ ) that cannot be detected by a single receptor population with a single affinity. One cellular mechanism that could generate two distinct populations of  $K_{ACh}$  channel is different levels of  $PIP_2$ .  $PIP_2$  is known as a prerequisite for  $K_{ACh}$  channel activation (23) and as a modulator for its gating kinetics (54). It has become apparent that  $PIP_2$  is enriched in membrane microdomains such as lipid rafts (55). Furthermore, the constituents of G-protein signaling and  $PIP_2$  metabolism are distributed differently within the plasma membrane, and after various stimuli, these constituents change their position with respect to these microdomains (49,56). In contrast, whereas phosphorylation of the  $K_{ACh}$  channel subunits (Kir3.1 and Kir3.4) by protein kinase A reportedly increases their open probability (24), phosphorylation of Kir3.1 by protein kinase C $\delta$  has been shown to reduce  $PIP_2$  sensitivity (57). These reports suggest that phosphorylation state also has the potential to generate quantitatively different  $K_{ACh}$  channel populations. Therefore, although the precise mechanisms that contribute to the generation of two distinct  $K_{ACh}$  channel populations are not known, various cellular signals may account for this phenomenon.

This study also demonstrates the role of short-term desensitization in vagal escape. Vagal escape usually refers to the two responses of the heart to continuous vagal stimulation: the gradual return of the heart rate toward control level (58,59) and the development of pacemaker activity in multimodal origins (60). Compensation from the sympathetic system has been proposed to cause vagal escape (17–20). However, since this phenomenon could be observed even in isolated sinoatrial nodes in the presence of a  $\beta$  blocker (52), the cellular machinery associated with the postjunc-

tional mechanism was expected to participate in vagal escape. The two assumptions that we proposed in this study are in agreement with this criterion. Therefore, the function of these two quantitatively different populations of  $m_2R$ s and  $K_{ACh}$  channels in short-term desensitization might be the missing cellular mechanisms in vagal escape from excessive parasympathetic nerve stimulation at the organ level. In general, the high-affinity  $m_2R$  is most often measured and assumed to be physiologically relevant. However, it has been suggested that activation of the low-affinity  $m_2R$ , rather than the high-affinity  $m_2R$ , is responsible for atrial bradycardia in mice (27). The effects of RSG4 are another interesting link between short-term desensitization and vagal escape. In one study, the spontaneous generation of action potential firing in RGS4-null sinoatrial node myocytes was suspended by application of high concentrations of carbachol, whereas that of the wild-type was resumed (53). RGS proteins are also required to reconstitute short-term desensitization without affecting the amplitude of the  $I_{K_{ACh}}$  (43). Because acceleration of the G-protein cycle enhances short-term desensitization (Fig. 5), RGS proteins are also important components to identify links between short-term desensitization and vagal escape in vivo.

In this study, we simulated short-term desensitization with a linear model of the G-protein cycle, which was improved on the basis of previous models (21). Although our model traced the  $I_{K_{ACh}}$  recorded from electrophysiological experiments performed with isolated atrial myocytes under physiological conditions well (2) (Figs. 2–4), qualitative comparisons of the effects of nucleotides on the experiment and simulation remain to be done. Our model structure is different from that proposed by Chuang et al. (11), in which the nucleotide-free state of G proteins is responsible for short-term desensitization. In their qualitative reproduction of short-term desensitization, a large amount of G protein was required to populate the nucleotide-free state. The lack of consideration for such a drastic case might appear as a limitation of this study. However, when a model structure is linear, intracellular signaling cascades within the G-protein cycle do not appear to reproduce short-term desensitization quantitatively (Fig. 5). In other words, if a signal component is identified to transiently influence the receptor-dependent  $K_{ACh}$  channel activation, as we hypothesized in this study for the  $K_{ACh/low}$  channel, it could become another candidate for the mechanism of short-term desensitization. On the other hand, as shown in Fig. 6, our model possesses voltage dependence as a modulator of RGS protein activity (44–46). Ligand binding in  $m_2R$  has been reported to show voltage dependence (61–63). How these voltage-dependent components should be considered with regard to the regulation of  $I_{K_{ACh}}$  may need to be clarified in future studies. By incorporating new knowledge, the model presented here can be used to gain more insights into short-term desensitization as well as other phenomena associated with  $I_{K_{ACh}}$ .

## SUPPORTING MATERIAL

Four figures are available at [http://www.biophysj.org/biophysj/supplemental/S0006-3495\(13\)00922-3](http://www.biophysj.org/biophysj/supplemental/S0006-3495(13)00922-3).

This work was supported by a Grant-in-Aid for Scientific Research on Innovative Areas (HD Physiology) (22136001) to Y.K., a Grant-in-Aid for Scientific Research on Priority Areas (17079005) to Y.K., a Grant-in-Aid for Young Scientists (B) (20790206 and 22790251) to S.M., a Grant-in-Aid for Scientific Research (C) (25460331) to S.M., a Grant-in-Aid for Scientific Research (C) (235903011) to A.I., the Global COE Program "In Silico Medicine" at Osaka University, and a grant from the Vehicle Racing Commemorative Foundation.

## REFERENCES

- Kurachi, Y., T. Nakajima, and T. Sugimoto. 1986. On the mechanism of activation of muscarinic K<sup>+</sup> channels by adenosine in isolated atrial cells: involvement of GTP-binding proteins. *Pflugers Arch.* 407:264–274.
- Kurachi, Y., T. Nakajima, and T. Sugimoto. 1987. Short-term desensitization of muscarinic K<sup>+</sup> channel current in isolated atrial myocytes and possible role of GTP-binding proteins. *Pflugers Arch.* 410:227–233.
- Logothetis, D. E., Y. Kurachi, ..., D. E. Clapham. 1987. The  $\beta\gamma$  subunits of GTP-binding proteins activate the muscarinic K<sup>+</sup> channel in heart. *Nature.* 325:321–326.
- Kurachi, Y., H. Ito, ..., M. Ui. 1989. Activation of atrial muscarinic K<sup>+</sup> channels by low concentrations of  $\beta\gamma$  subunits of rat brain G protein. *Pflugers Arch.* 413:325–327.
- Shui, Z., M. R. Boyett, and W. J. Zang. 1997. ATP-dependent desensitization of the muscarinic K<sup>+</sup> channel in rat atrial cells. *J. Physiol.* 505:77–93.
- Bünemann, M., K. B. Lee, ..., M. M. Hosey. 1999. Desensitization of G-protein-coupled receptors in the cardiovascular system. *Annu. Rev. Physiol.* 61:169–192.
- Shui, Z., T. T. Yamanushi, and M. R. Boyett. 2001. Evidence of involvement of GIRK1/GIRK4 in long-term desensitization of cardiac muscarinic K<sup>+</sup> channels. *Am. J. Physiol. Heart Circ. Physiol.* 280:H2554–H2562.
- Shui, Z., I. A. Khan, ..., M. R. Boyett. 2002. Role of receptor kinase in long-term desensitization of the cardiac muscarinic receptor-K<sup>+</sup> channel system. *Am. J. Physiol. Heart Circ. Physiol.* 283:H819–H828.
- Yamanushi, T. T., Z. Shui, ..., M. R. Boyett. 2007. Role of internalization of M<sub>2</sub> muscarinic receptor via clathrin-coated vesicles in desensitization of the muscarinic K<sup>+</sup> current in heart. *Am. J. Physiol. Heart Circ. Physiol.* 292:H1737–H1746.
- Shui, Z., I. A. Khan, ..., M. R. Boyett. 1998. Role of receptor kinase in short-term desensitization of cardiac muscarinic K<sup>+</sup> channels expressed in Chinese hamster ovary cells. *J. Physiol.* 507:325–334.
- Chuang, H. H., M. Yu, ..., L. Y. Jan. 1998. Evidence that the nucleotide exchange and hydrolysis cycle of G proteins causes acute desensitization of G-protein gated inward rectifier K<sup>+</sup> channels. *Proc. Natl. Acad. Sci. USA.* 95:11727–11732.
- Kim, D. 1993. Mechanism of rapid desensitization of muscarinic K<sup>+</sup> current in adult rat and guinea pig atrial cells. *Circ. Res.* 73:89–97.
- Saitoh, O., I. Masuho, ..., Y. Kubo. 2001. Regulator of G protein signaling 8 (RGS8) requires its NH<sub>2</sub> terminus for subcellular localization and acute desensitization of G protein-gated K<sup>+</sup> channels. *J. Biol. Chem.* 276:5052–5058.
- Leaney, J. L., A. Benians, ..., A. Tinker. 2004. Rapid desensitization of G protein-gated inwardly rectifying K<sup>(+)</sup> currents is determined by G protein cycle. *Am. J. Physiol. Cell Physiol.* 287:C182–C191.
- Bender, K., M. C. Wellner-Kienitz, ..., L. Pott. 2004. Acute desensitization of GIRK current in rat atrial myocytes is related to K<sup>+</sup> current flow. *J. Physiol.* 561:471–483.
- Sickmann, T., and C. Alzheimer. 2003. Short-term desensitization of G-protein-activated, inwardly rectifying K<sup>+</sup> (GIRK) currents in pyramidal neurons of rat neocortex. *J. Neurophysiol.* 90:2494–2503.
- Raper, C., and J. Wale. 1969. Sympathetic involvement in vagal escape and the effects of  $\beta$ -receptor blocking drugs. *Eur. J. Pharmacol.* 8:47–57.
- Campos, H. A., and A. H. Friedman. 1963. The influence of acute sympathetic denervation, reserpine and choline Xylyl ether on vagal escape. *J. Physiol.* 169:249–262.
- Roberts, J., and R. P. Stadter. 1960. Effect of reserpine on ventricular escape. *Science.* 132:1836–1837.
- Obrink, K. J., and H. E. Essex. 1953. Chronotropic effects of vagal stimulation and acetylcholine on certain mammalian hearts with special reference to the mechanism of vagal escape. *Am. J. Physiol.* 174:321–330.
- Murakami, S., S. Suzuki, ..., Y. Kurachi. 2010. Cellular modelling: experiments and simulation to develop a physiological model of G-protein control of muscarinic K<sup>+</sup> channels in mammalian atrial cells. *Philos. Trans. A Math. Phys. Eng. Sci.* 368:2983–3000.
- Kim, D. 1991. Modulation of acetylcholine-activated K<sup>+</sup> channel function in rat atrial cells by phosphorylation. *J. Physiol.* 437:133–155.
- Huang, C. L., S. Feng, and D. W. Hilgemann. 1998. Direct activation of inward rectifier potassium channels by PIP<sub>2</sub> and its stabilization by G $\beta\gamma$ . *Nature.* 391:803–806.
- Müllner, C., D. Vorobiov, ..., W. Schreibmayer. 2000. Heterologous facilitation of G protein-activated K<sup>+</sup> channels by  $\beta$ -adrenergic stimulation via cAMP-dependent protein kinase. *J. Gen. Physiol.* 115:547–558.
- Christopoulos, A., M. K. Grant, and E. E. El-Fakahany. 2000. Transducer abstraction: a novel approach to the detection of partial agonist efficacy in radioligand binding studies. *J. Pharmacol. Toxicol. Methods.* 43:55–67.
- Mizushima, A., S. Uchida, ..., H. Yoshida. 1987. Cardiac M<sub>2</sub> receptors consist of two different types, both regulated by GTP. *Eur. J. Pharmacol.* 135:403–409.
- Stengel, P. W., and M. L. Cohen. 2001. Low-affinity M<sub>2</sub> receptor binding state mediates mouse atrial bradycardia: comparative effects of carbamylcholine and the M<sub>1</sub> receptor agonists sabcomeline and xanomeline. *J. Pharmacol. Exp. Ther.* 296:818–824.
- Galper, J. B., L. C. Dziekan, ..., T. W. Smith. 1982. The biphasic response of muscarinic cholinergic receptors in cultured heart cells to agonists. Effects on receptor number and affinity in intact cells and homogenates. *J. Biol. Chem.* 257:10344–10356.
- Haga, K., T. Haga, and A. Ichiyama. 1986. Reconstitution of the muscarinic acetylcholine receptor. Guanin nucleotide-sensitive high affinity binding of agonists to purified muscarinic receptors reconstituted with GTP-binding proteins (G<sub>i</sub> and G<sub>o</sub>). *J. Biol. Chem.* 261:10133–10140.
- Demir, S. S., J. W. Clark, and W. R. Giles. 1999. Parasympathetic modulation of sinoatrial node pacemaker activity in rabbit heart: a unifying model. *Am. J. Physiol.* 276:H2221–H2244.
- Demir, S. S., J. W. Clark, ..., W. R. Giles. 1994. A mathematical model of a rabbit sinoatrial node cell. *Am. J. Physiol.* 266:C832–C852.
- Kurata, Y., I. Hisatome, ..., T. Shibamoto. 2002. Dynamical description of sinoatrial node pacemaking: improved mathematical model for primary pacemaker cell. *Am. J. Physiol. Heart Circ. Physiol.* 283:H2074–H2101.
- Monod, J., J. Wyman, and J. P. Changeux. 1965. On the nature of allosteric transitions: a plausible model. *J. Mol. Biol.* 12:88–118.
- Hosoya, Y., M. Yamada, ..., Y. Kurachi. 1996. A functional model for G protein activation of the muscarinic K<sup>+</sup> channel in guinea pig atrial myocytes. Spectral analysis of the effect of GTP on single-channel kinetics. *J. Gen. Physiol.* 108:485–495.
- Kim, D., and R. Duff. 1990. Activation of kinetically different populations of K channels by adenosine in rat atria. *Biophys. J.* 57:312a.

36. Mintert, E., L. I. Bösche, ..., K. Bender. 2007. Generation of a constitutive  $Na^+$ -dependent inward-rectifier current in rat adult atrial myocytes by overexpression of Kir3.4. *J. Physiol.* 585:3–13.
37. Corey, S., and D. E. Clapham. 2001. The stoichiometry of  $G_{\beta\gamma}$  binding to G-protein-regulated inwardly rectifying  $K^+$  channels (GIRKs). *J. Biol. Chem.* 276:11409–11413.
38. Ito, H., R. T. Tung, ..., Y. Kurachi. 1992. On the mechanism of G protein  $\beta\gamma$  subunit activation of the muscarinic  $K^+$  channel in guinea pig atrial cell membrane. Comparison with the ATP-sensitive  $K^+$  channel. *J. Gen. Physiol.* 99:961–983.
39. Yi, T. M., H. Kitano, and M. I. Simon. 2003. A quantitative characterization of the yeast heterotrimeric G protein cycle. *Proc. Natl. Acad. Sci. USA.* 100:10764–10769.
40. Saucerman, J. J., L. L. Brunton, ..., A. D. McCulloch. 2003. Modeling  $\beta$ -adrenergic control of cardiac myocyte contractility in silico. *J. Biol. Chem.* 278:47997–48003.
41. Mosser, V. A., I. J. Amana, and M. I. Schimerlik. 2002. Kinetic analysis of  $M_2$  muscarinic receptor activation of  $G_i$  in Sf9 insect cell membranes. *J. Biol. Chem.* 277:922–931.
42. Doupnik, C. A., N. Davidson, ..., P. Kofuji. 1997. RGS proteins reconstitute the rapid gating kinetics of  $G_{\beta\gamma}$ -activated inwardly rectifying  $K^+$  channels. *Proc. Natl. Acad. Sci. USA.* 94:10461–10466.
43. Mutneja, M., F. Berton, ..., P. A. Slesinger. 2005. Endogenous RGS proteins enhance acute desensitization of GABA<sub>B</sub> receptor-activated GIRK currents in HEK-293T cells. *Pflugers Arch.* 450:61–73.
44. Ishii, M., A. Inanobe, ..., Y. Kurachi. 2001.  $Ca^{2+}$  elevation evoked by membrane depolarization regulates G protein cycle via RGS proteins in the heart. *Circ. Res.* 89:1045–1050.
45. Inanobe, A., S. Fujita, ..., Y. Kurachi. 2001. Interaction between the RGS domain of RGS4 with G protein  $\alpha$  subunits mediates the voltage-dependent relaxation of the G protein-gated potassium channel. *J. Physiol.* 535:133–143.
46. Ishii, M., A. Inanobe, and Y. Kurachi. 2002.  $PIP_3$  inhibition of RGS protein and its reversal by  $Ca^{2+}$ /calmodulin mediate voltage-dependent control of the G protein cycle in a cardiac  $K^+$  channel. *Proc. Natl. Acad. Sci. USA.* 99:4325–4330.
47. Ikegaya, T., T. Nishiyama, ..., N. Yamazaki. 1990. Interaction of atrial muscarinic receptors with three kinds of GTP-binding proteins. *J. Mol. Cell. Cardiol.* 22:343–351.
48. Zaza, A., R. B. Robinson, and D. DiFrancesco. 1996. Basal responses of the L-type  $Ca^{2+}$  and hyperpolarization-activated currents to autonomic agonists in the rabbit sino-atrial node. *J. Physiol.* 491:347–355.
49. Cho, H., J. Y. Hwang, ..., W. K. Ho. 2002. Acetylcholine-induced phosphatidylinositol 4,5-bisphosphate depletion does not cause short-term desensitization of G protein-gated inwardly rectifying  $K^+$  current in mouse atrial myocytes. *J. Biol. Chem.* 277:27742–27747.
50. Kobrinsky, E., T. Mirshahi, ..., D. E. Logothetis. 2000. Receptor-mediated hydrolysis of plasma membrane messenger  $PIP_2$  leads to  $K^+$ -current desensitization. *Nat. Cell Biol.* 2:507–514.
51. Boyett, M. R., and A. Roberts. 1987. The fade of the response to acetylcholine at the rabbit isolated sino-atrial node. *J. Physiol.* 393:171–194.
52. DiFrancesco, D. 1990. Current  $I_f$  and the neuronal modulation of heart rate. In *Cardiac Electrophysiology*. D. Zipes and J. Jalife, editors. Saunders, Philadelphia, PA, pp. 28–35.
53. Cifelli, C., R. A. Rose, ..., S. P. Heximer. 2008. RGS4 regulates parasympathetic signaling and heart rate control in the sinoatrial node. *Circ. Res.* 103:527–535.
54. Sui, J. L., J. Petit-Jacques, and D. E. Logothetis. 1998. Activation of the atrial  $K_{ACH}$  channel by the  $\beta\gamma$  subunits of G proteins or intracellular  $Na^+$  ions depends on the presence of phosphatidylinositol phosphates. *Proc. Natl. Acad. Sci. USA.* 95:1307–1312.
55. Gamper, N., and M. S. Shapiro. 2007. Target-specific  $PIP_2$  signalling: how might it work? *J. Physiol.* 582:967–975.
56. Meyer, T., M. C. Wellner-Kienitz, ..., L. Pott. 2001. Depletion of phosphatidylinositol 4,5-bisphosphate by activation of phospholipase C-coupled receptors causes slow inhibition but not desensitization of G protein-gated inward rectifier  $K^+$  current in atrial myocytes. *J. Biol. Chem.* 276:5650–5658.
57. Brown, S. G., A. Thomas, ..., J. L. Leaney. 2005. PKC-delta sensitizes Kir3.1/3.2 channels to changes in membrane phospholipid levels after  $M_3$  receptor activation in HEK-293 cells. *Am. J. Physiol. Cell Physiol.* 289:C543–C556.
58. Bain, W. A. 1932. A method of demonstrating the humoral transmission of the effects of cardiac vagus stimulation in the frog. *Exp. Physiol.* 22:269–274.
59. McDowall, R. J. 1926. On the nature and significance of vagus escape. *J. Physiol.* 61:131–140.
60. Wallace, A. G., and W. M. Daggett. 1964. Pacemaker activity during vagal escape rhythms. *Circ. Res.* 15:93–102.
61. Ben-Chaim, Y., B. Chanda, ..., H. Parnas. 2006. Movement of 'gating charge' is coupled to ligand binding in a G-protein-coupled receptor. *Nature.* 444:106–109.
62. Ben-Chaim, Y., O. Tour, ..., H. Parnas. 2003. The  $M_2$  muscarinic G-protein-coupled receptor is voltage-sensitive. *J. Biol. Chem.* 278:22482–22491.
63. Moreno-Galindo, E. G., J. A. Sánchez-Chapula, ..., R. A. Navarro-Polanco. 2011. Relaxation gating of the acetylcholine-activated inward rectifier  $K^+$  current is mediated by intrinsic voltage sensitivity of the muscarinic receptor. *J. Physiol.* 589:1755–1767.

# Short-Term Desensitization of Muscarinic K<sup>+</sup> Current in the Heart

Shingo Murakami,<sup>†‡\*</sup> Atsushi Inanobe,<sup>†‡</sup> and Yoshihisa Kurachi<sup>†‡\*</sup>

<sup>†</sup>Division of Molecular and Cellular Pharmacology, Department of Pharmacology, Graduate School of Medicine, and <sup>‡</sup>The Center for Advanced Medical Engineering and Informatics, Osaka University, Osaka, Japan

## Appendix Figure Legends

### Appendix Figure 1. Simulated [G<sub>βγ</sub>]-dependent activation and current–voltage relationship of the constructed K<sub>ACh</sub> channel model

(A) [G<sub>βγ</sub>]-dependent activation of the constructed K<sub>ACh</sub> channel model. Relative channel availabilities (relative NP<sub>oS</sub>) of K<sub>ACh/high</sub> channel (solid line) and K<sub>ACh/low</sub> channel (dashed line) are calculated by using Eqs. 1 and 2 and compared with that from inside-out patch measurements with a rat atrial myocyte membrane (38) (dotted line).

(B) The current–voltage relationship of I<sub>K<sub>ACh</sub></sub> in the constructed K<sub>ACh</sub> channel model. The current–voltage dependent part in Eq. 2 is shown with experimental I<sub>K<sub>ACh</sub></sub> in guinea pig atrial myocytes (1) (filled circles).

### Appendix Figure 2. Effects of changes in low affinities of K<sub>ACh</sub> channel and m2R on short-term desensitization

(AB) Effect of changes in low affinity of K<sub>ACh</sub> channel on dose-response curves for ACh-induced peak and quasi-steady I<sub>K<sub>ACh</sub></sub>. The simulated peak current (I<sub>P</sub>) and quasi-steady-state current (I<sub>S</sub>) are shown as gray lines for control (K<sub>D</sub> for K<sub>ACh/low</sub> channel is tripled from K<sub>D</sub> for K<sub>ACh/high</sub> channel), red lines in (A) for doubled K<sub>D</sub> for K<sub>ACh/low</sub> channel and blue lines in (B) for sextuple K<sub>D</sub> for K<sub>ACh/low</sub> channel. Experimental data (2) for peak and quasi-steady I<sub>K<sub>ACh</sub></sub> are shown as circles with standard deviation [SD]. In the graph, the quasi-steady I<sub>K<sub>ACh</sub></sub> induced by 100 μM ACh is expressed as 1.

(CD) Effect of changes in low affinity of  $m_2R$  on dose-response curves for  $I_P$  and  $I_S$ . The same as in (AB) except red lines in (C) are for ten-fold  $K_D$  for  $m_2R$  and blue lines in (D) for thousand-fold  $K_D$  for  $m_2R$ .

### **Appendix Figure 3. [AR·G-GDP] and [AR·G-GTP] during short-term desensitization**

Concentrations of G-proteins of nucleotide-bound states before and after GDP/GTP exchange ((ACEGI) for [AR·G-GDP] and (BDFHJ) for [AR·G-GTP] in) are shown for the same simulation conditions in Figure 5.

(AB) Traces of [AR·G-GDP] and [AR·G-GTP] elicited by 200  $\mu$ M GTP. GTP was applied in the same way as in Fig. 5A. The bar above the traces represents the period of GTP perfusion. The arrowheads indicate the zero level of each trace.

(CD) Effect of 1 mM GDP. As done in Fig 5B, [AR·G-GDP] and [AR·G-GTP] were simulated in the same way as in (AB) except that 1 mM GDP was applied during the entire simulation period.

(EF) Traces of simulated [AR·G-GDP] and [AR·G-GTP] with low receptor expression. As done in Fig 5C, [AR·G-GDP] and [AR·G-GTP] were calculated in the same way as in (AB) except that  $[R_H]$  and  $[R_L]$  were lowered to 50%.

(GH) Effect of high GDP/GTP exchange activity on [AR·G-GDP] and [AR·G-GTP]. As done in Fig 5D, GDP/GTP exchange was enhanced by increasing the rate constants for GDP/GTP exchange by a factor of 5. The period during which ACh was perfused is shown as a bar above the trace.

(IJ) The effect of low GDP/GTP exchange activity on [AR·G-GDP] and [AR·G-GTP]. As done in Fig 5E, GDP/GTP exchange was lowered by reducing the rate constants to one-half.

### **Appendix Figure 4. Sensitivity of the maximum conductance of the $K_{ACh}$ channel to asystole length**

The effects of maximum conductance of the  $K_{ACh}$  channel on asystole length with 10  $\mu$ M [ACh] are calculated for the (A) Demir and (B) Kurata sinoatrial node models. Only results

obtained when sinus rhythms were resumed are shown as lines. The cross marks correspond to the simulation conditions in Figure 7.

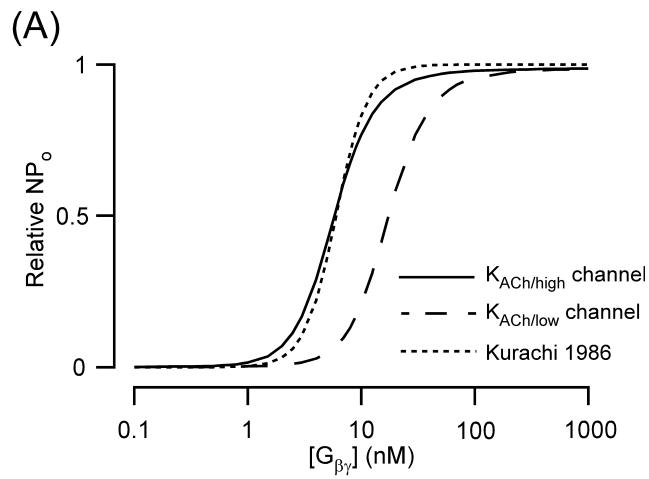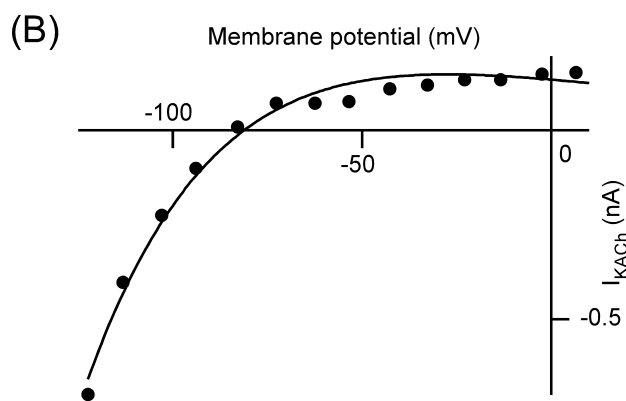

Appendix Fig. 1 Murakami et al.

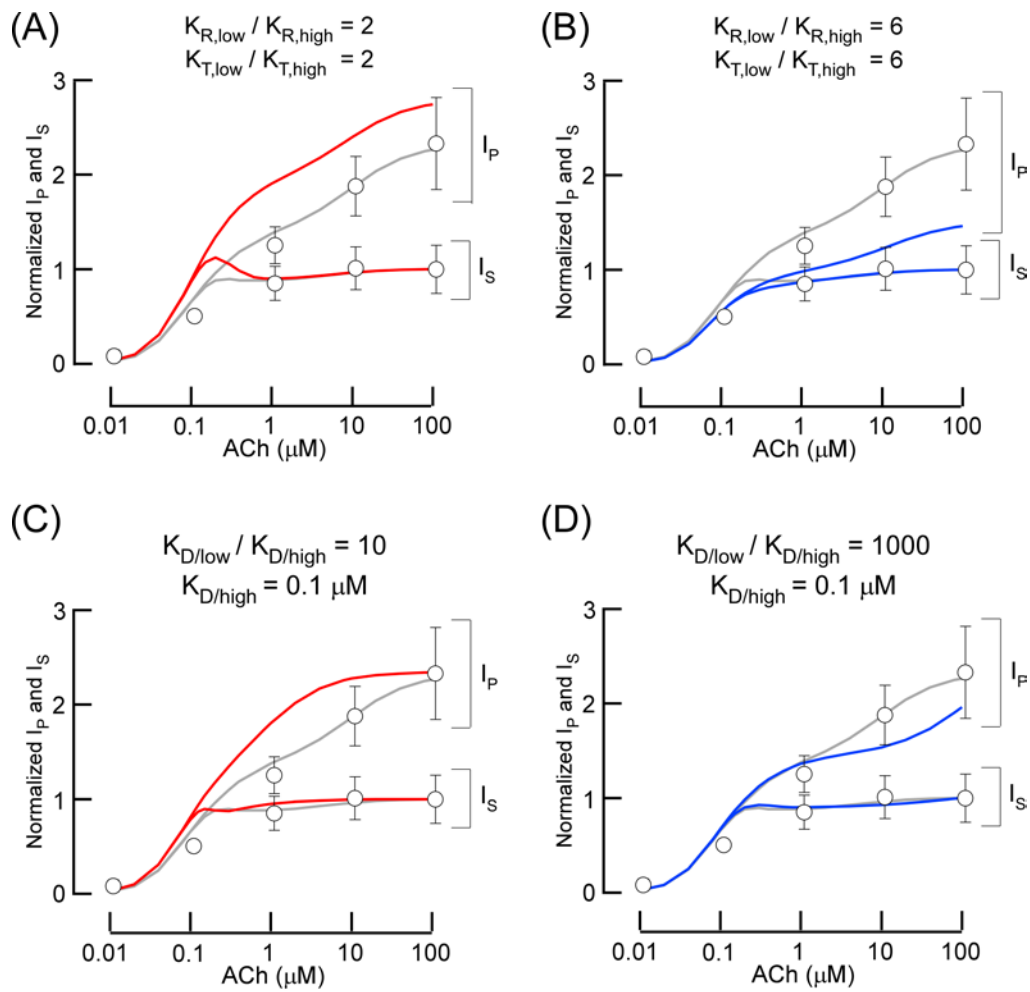

Appendix Fig. 2 Murakami et al.



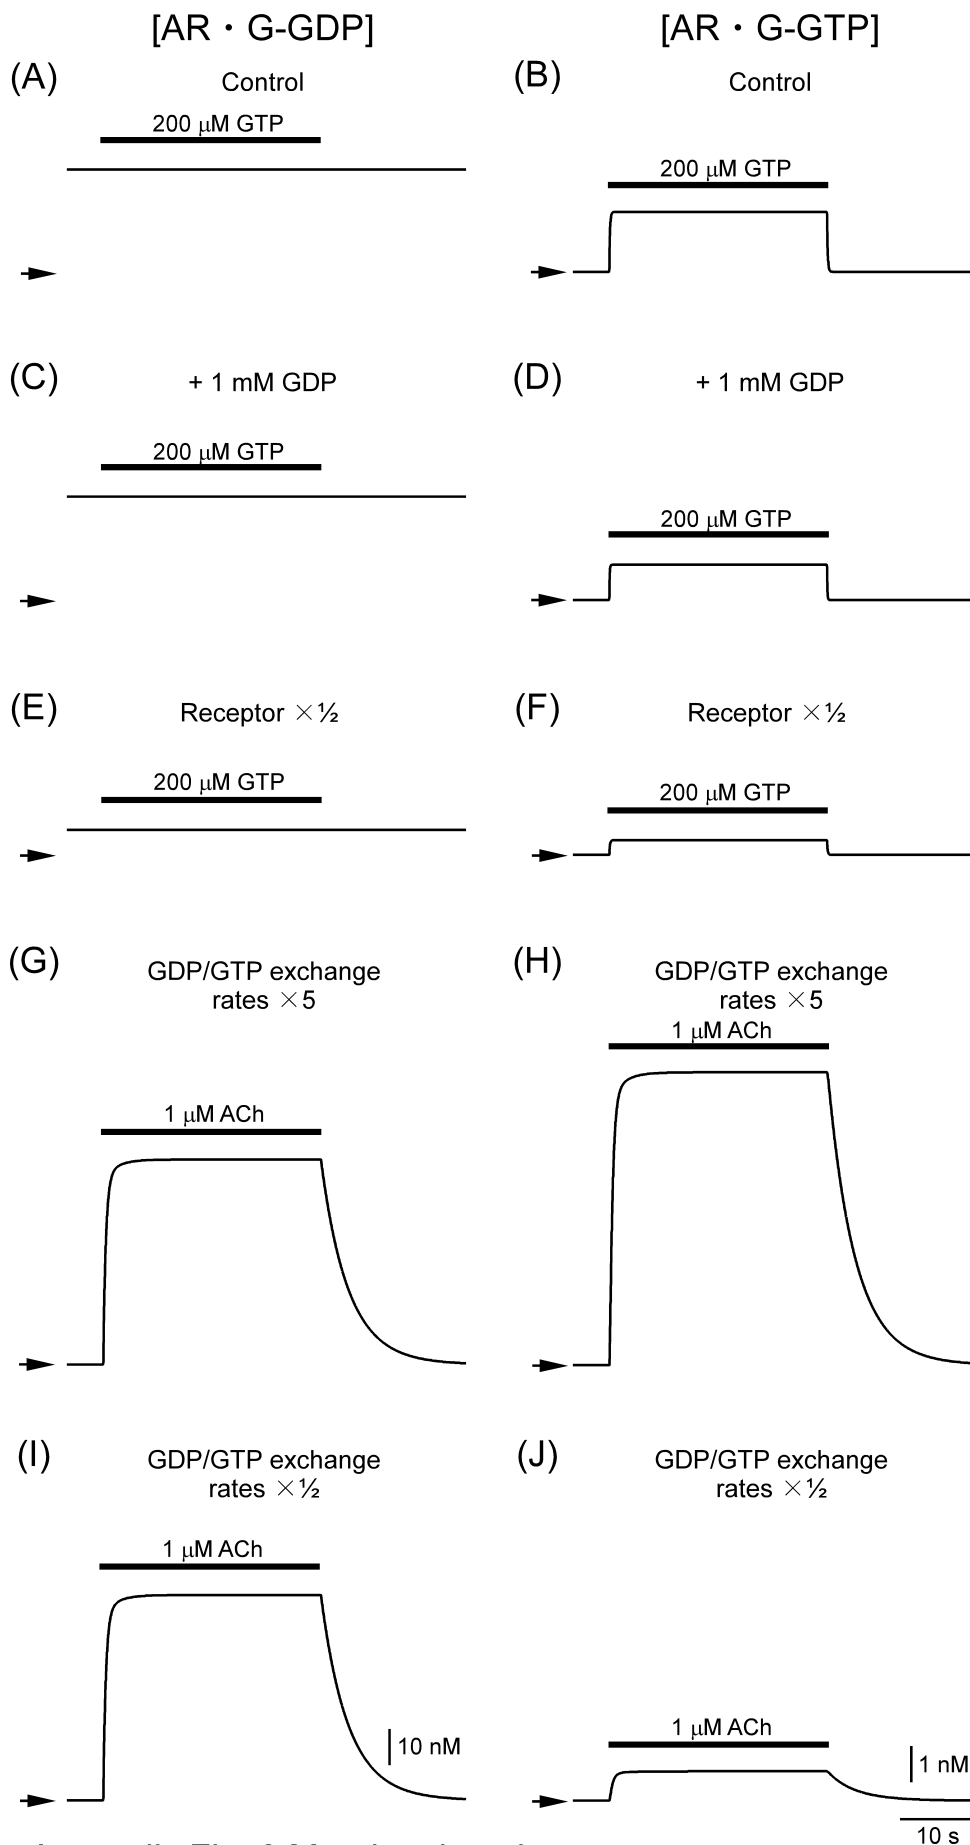

Appendix Fig. 3 Murakami et al.

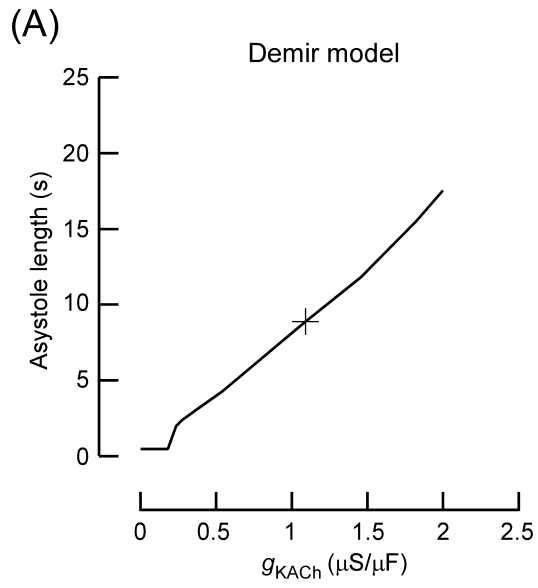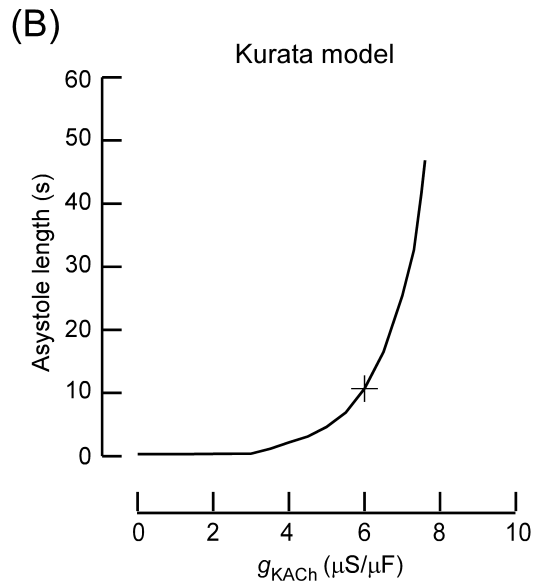

Appendix Fig. 4 Murakami et al.
